# Supplementary material
Source: ML conference proceedings conference paper supplement (https://proceedings.mlr.press/v32/krichene14.html)
Supplement: Supplementary file 1 [file krichene14-supp.zip › no-regret-convergence-supplementary.pdf]

# On the convergence of no-regret learning in selfish routing Supplementary material, ICML 2014

Walid Krichene      Benjamin Drighès      Alexandre Bayen

## 1 Proof of Lemma 1

**Lemma 1.** *Let  $(\gamma_\tau)_{\tau \in \mathbb{N}}$  be a non-summable sequence of positive weights. If a real sequence  $(u^{(\tau)})_{\tau \in \mathbb{N}}$  converges absolutely to  $u$  in the sense of Cesàro means w.r.t.  $(\gamma_\tau)_\tau$ , that is  $\lim_{T \rightarrow \infty} \frac{\sum_{\tau \leq T} \gamma_\tau |u^{(\tau)} - u|}{\sum_{\tau \leq T} \gamma_\tau} = 0$ , then there exists a subset of indexes  $\mathcal{T}$  of density one such that the subsequence  $(u^{(\tau)})_{\tau \in \mathcal{T}}$  converges to  $u$ .*

*Proof.* Let  $\epsilon > 0$ , and define the set  $\mathcal{I}_\epsilon = \{\tau \in \mathbb{N} : \|u^{(\tau)} - u\| \geq \epsilon\}$ . First, we show that for all  $\epsilon > 0$ ,  $\mathcal{I}_\epsilon$  has zero density. Indeed, we have for all  $\tau \in \mathcal{I}_\epsilon$ ,  $0 \leq \epsilon \leq \|u^{(\tau)} - u\|$ , thus

$$0 \leq \frac{\sum_{\tau \in \mathcal{I}_\epsilon : \tau \leq T} \gamma_\tau \epsilon}{\sum_{\tau \in \mathbb{N} : \tau \leq T} \gamma_\tau} \leq \frac{\sum_{\tau \in \mathbb{N} : \tau \leq T} \gamma_\tau \|u^{(\tau)} - u\|}{\sum_{\tau \in \mathbb{N} : \tau \leq T} \gamma_\tau}$$

But the right-hand side converges to 0 by assumption, therefore  $\lim_{T \rightarrow \infty} \frac{\sum_{\tau \in \mathcal{I}_\epsilon : \tau \leq T} \gamma_\tau}{\sum_{\tau \in \mathbb{N} : \tau \leq T} \gamma_\tau} = 0$ , and  $\mathcal{I}_\epsilon$  has zero density w.r.t.  $(\gamma_\tau)$ .

Next, we will construct a set  $\mathcal{I} \subset \mathbb{N}$  of zero density, such that the subsequence  $(u_\tau)_{\tau \in \mathbb{N} \setminus \mathcal{I}}$  converges. For all  $k > 0$ , let

$$p_k(T) = \sum_{\tau \in \mathcal{I}_{\frac{1}{k}} : \tau \leq T} \gamma_\tau$$

Since  $\lim_{T \rightarrow \infty} \frac{p_k(T)}{\sum_{\tau \in \mathbb{N} : \tau \leq T} \gamma_\tau} = 0$ ,  $\exists T_k > 0$  such that for all  $T \geq T_k$ ,  $\frac{p_k(T)}{\sum_{\tau \in \mathbb{N} : \tau \leq T} \gamma_\tau} \leq \frac{1}{k}$ . Without loss of generality, we can assume that  $(T_k)_{k \in \mathbb{N}^*}$  is increasing. Now, let

$$\mathcal{I} = \bigcup_{k \in \mathbb{N}^*} (\mathcal{I}_{\frac{1}{k}} \cap \{T_k, \dots, T_{k+1} - 1\}).$$

Then we have for all  $k \in \mathbb{N}^*$ ,  $\mathcal{I} \cap \{0, \dots, T_{k+1} - 1\} = \left( \bigcup_{j=1}^k \mathcal{I}_{\frac{1}{j}} \right) \cap \{0, \dots, T_{k+1} - 1\}$ . But since  $\mathcal{I}_1 \subset \mathcal{I}_{\frac{1}{2}} \subset \dots \subset \mathcal{I}_{\frac{1}{k}}$ , we have  $\mathcal{I} \cap \{0, \dots, T_{k+1} - 1\} \subset \mathcal{I}_{\frac{1}{k}} \cap \{0, \dots, T_{k+1} - 1\}$ , thus for all  $T$  such that  $T_k \leq T < T_{k+1}$ , we have

$$\frac{\sum_{\tau \in \mathcal{I} : \tau \leq T} \gamma_\tau}{\sum_{\tau \in \mathbb{N} : \tau \leq T} \gamma_\tau} \leq \frac{\sum_{\tau \in \mathcal{I}_{\frac{1}{k}} : \tau \leq T} \gamma_\tau}{\sum_{\tau \in \mathbb{N} : \tau \leq T} \gamma_\tau} = \frac{p_k(T)}{\sum_{\tau \in \mathbb{N} : \tau \leq T} \gamma_\tau} \leq \frac{1}{k}$$

which proves that  $\mathcal{I}$  has zero density.

Let  $\mathcal{T} = \mathbb{N} \setminus \mathcal{I}$ . We have that  $\mathcal{T}$  has density one, and it remains to prove that the subsequence  $(u^{(\tau)})_{\tau \in \mathcal{T}}$  converges to  $u$ . For all  $k$ , there exists  $S_k \in \mathcal{T}$  such that  $S_k \geq T_k$ . For all  $\tau \in \mathcal{T}$  with  $\tau \geq S_k$ , there exists  $k' \geq k$  such that  $T_{k'} \leq \tau < T_{k'+1}$ . Since  $\tau \notin \mathcal{I}$ , we must have  $\tau \notin \mathcal{I}_{\frac{1}{k'}}$ , therefore

$$\|u^{(\tau)} - u\| < \frac{1}{k'} \leq \frac{1}{k}.$$

This proves that  $(u^{(\tau)})_{\tau \in \mathcal{T}}$  converges to  $u$ . □

## 2 Proof of Lemma 3

**Lemma 3** (Convergence of potentials under AREP algorithms). *Let  $\Gamma$  be a compact invariant set for the replicator ODE  $\dot{\mu} = F(\mu)$ ,  $V$  a Lyapunov function for  $\Gamma$ , and assume  $V(\Gamma)$  has empty interior. Assume that the sequence of distributions  $(\mu^{(\tau)})_{\tau \in \mathbb{N}}$  obey an AREP update rule. Then the sequence of potentials  $(V(\mu^{(\tau)}))_{\tau}$  converges.*

*Proof.* Let  $M$  be the affine interpolated process of the sequence  $(\mu^{(\tau)})_{\tau}$  with time steps  $(\gamma_{\tau})_{\tau}$ . That is,  $M$  is the continuous function defined on  $\mathbb{R}_+$  and with values in  $\Delta$ , such that for all  $\tau$  and all  $s \in [0, \gamma_{\tau})$

$$M(T_{\tau} + s) = \mu^{(\tau)} + s \frac{\mu^{(\tau+1)} - \mu^{(\tau)}}{\gamma_{\tau}}$$

where  $T_{\tau} = \sum_{t \leq \tau} \gamma_t$ .

First, by definition of the AREP class, we have  $(\mu^{(\tau)})$  satisfies an update equation of the form

$$\mu^{(\tau+1)} - \mu^{(\tau)} = \gamma_{\tau} \left( F(\mu^{(\tau)}) + U^{(\tau+1)} \right)$$

where  $(U^{(\tau)})$  is a bounded sequence of perturbations that satisfies the condition

$$\lim_{\tau_1 \rightarrow \infty} \max_{\tau_2: \sum_{\tau=\tau_1}^{\tau_2} \gamma_{\tau} < T} \left\| \sum_{\tau=\tau_1}^{\tau_2} \gamma_{\tau} U^{(\tau+1)} \right\| = 0$$

Furthermore, the sequence  $(\mu^{(\tau)})$  is bounded since  $\Delta$  is compact. by Proposition 4.1 in [1], the affine interpolated process  $M$  is an asymptotic pseudo trajectory of the vector field  $F$ . It follows by Theorem 5.7 in [1] that the set  $L(M)$  of limit points of  $M$  is internally chain transitive.

Since  $V$  is a Lyapunov function for the compact invariant set  $\Gamma$ , and  $V(\Gamma)$  has empty interior, by Proposition 6.4 in [1],  $\Gamma$  contains every internally chain transitive set and  $V$  is constant on  $\Gamma$ . In particular, we have  $L(M) \subset \Gamma$  and there exists  $v \in \mathbb{R}$  such that  $V(\mu) = v$  for all  $\mu \in L(M)$ .

Now consider the sequence of potential values  $(V(\mu^{(\tau)}))_{\tau \in \mathbb{N}}$ . Since  $V$  is continuous and  $\Delta$  is compact,  $V(\Delta)$  is compact, and  $(V(\mu^{(\tau)}))_{\tau \in \mathbb{N}}$  has at least one limit point. Let  $\hat{v}$  be such a limit point, that is,  $\hat{v}$  is the limit of a subsequence  $(V(\mu^{(\tau)}))_{\tau \in \mathcal{T}}$  where  $\mathcal{T} \subseteq \mathbb{N}$ . The subsequence  $(\mu^{(\tau)})_{\tau \in \mathcal{T}}$  lives in the compact set  $\Delta$ , thus we can extract a further subsequence which converges, that is, there exists  $\mathcal{T}' \subset \mathcal{T}$  and  $\hat{\mu} \in \Delta$  such that  $(\mu^{(\tau)})_{\tau \in \mathcal{T}'}$  converges to  $\hat{\mu}$ . By continuity of  $V$ ,  $V(\hat{\mu}) = \hat{v}$ . But since  $\hat{\mu} \in L(M)$ , we also have  $V(\hat{\mu}) = v$ , therefore  $\hat{v} = v$ . This proves that  $V(\mu^{(\tau)})_{\tau}$  has a unique limit point equal to  $v$ , thus it converges to  $v$ .  $\square$

## References

- [1] Michel Benaïm. Dynamics of stochastic approximation algorithms. In *Séminaire de probabilités XXXIII*, pages 1–68. Springer, 1999.
